# Supplementary material for: Macrophage ferroportin is essential for stromal cell proliferation in wound healing
Source: PubMed Central journal article supplement — Haematologica. 2018 Aug 16;104(1):47–58. doi: 10.3324/haematol.2018.197517 (PMC6312033; doi:10.3324/haematol.2018.197517), 2019-01
Supplement: 2018_197517-Disclosures_and_Contributions.pdf [file 2018_197517-Disclosures_and_Contributions.pdf]

Haematologica  
HAEMATOL/2018/197517  
Version 3

Macrophage ferroportin is essential for stromal cell proliferation in  
wound healing

Stefania Recalcati, Elena Gammella, Paolo Buratti, Andrea Doni,  
Achille Anselmo, Massimo Locati, and Gaetano Cairo

Disclosures: none

Contributions: S.R. designed and coordinated the project, planned and performed experiments, and co-wrote the manuscript. E.G and P.B. performed mouse breeding, most of the experiments and data analysis. A.D and A.A. performed confocal microscopy and FACS analyses, respectively. M.L. supervised the project, provided advice for experiments, discussed the results and co-wrote the manuscript. G.C. conceived and coordinated the study, interpreted data, and co-wrote the manuscript. All authors discussed the results and commented on the manuscript.
